# Supplementary material for: Simulation of Arctic Thin Ice Clouds with Canadian Regional Climate Model Version 6: Verification against CloudSat-CALIPSO
Source: MDPI journal article supplement (doi:10.3390/atmos13020187), 2022-01-24
Supplement: s1 [file s1]

## Supplementary Materials:

Housseyni Sankaré <sup>1,\*</sup>, Jean-Pierre Blanchet <sup>1</sup>, René Laprise <sup>1</sup> and Norman T. O'Neill <sup>2</sup>

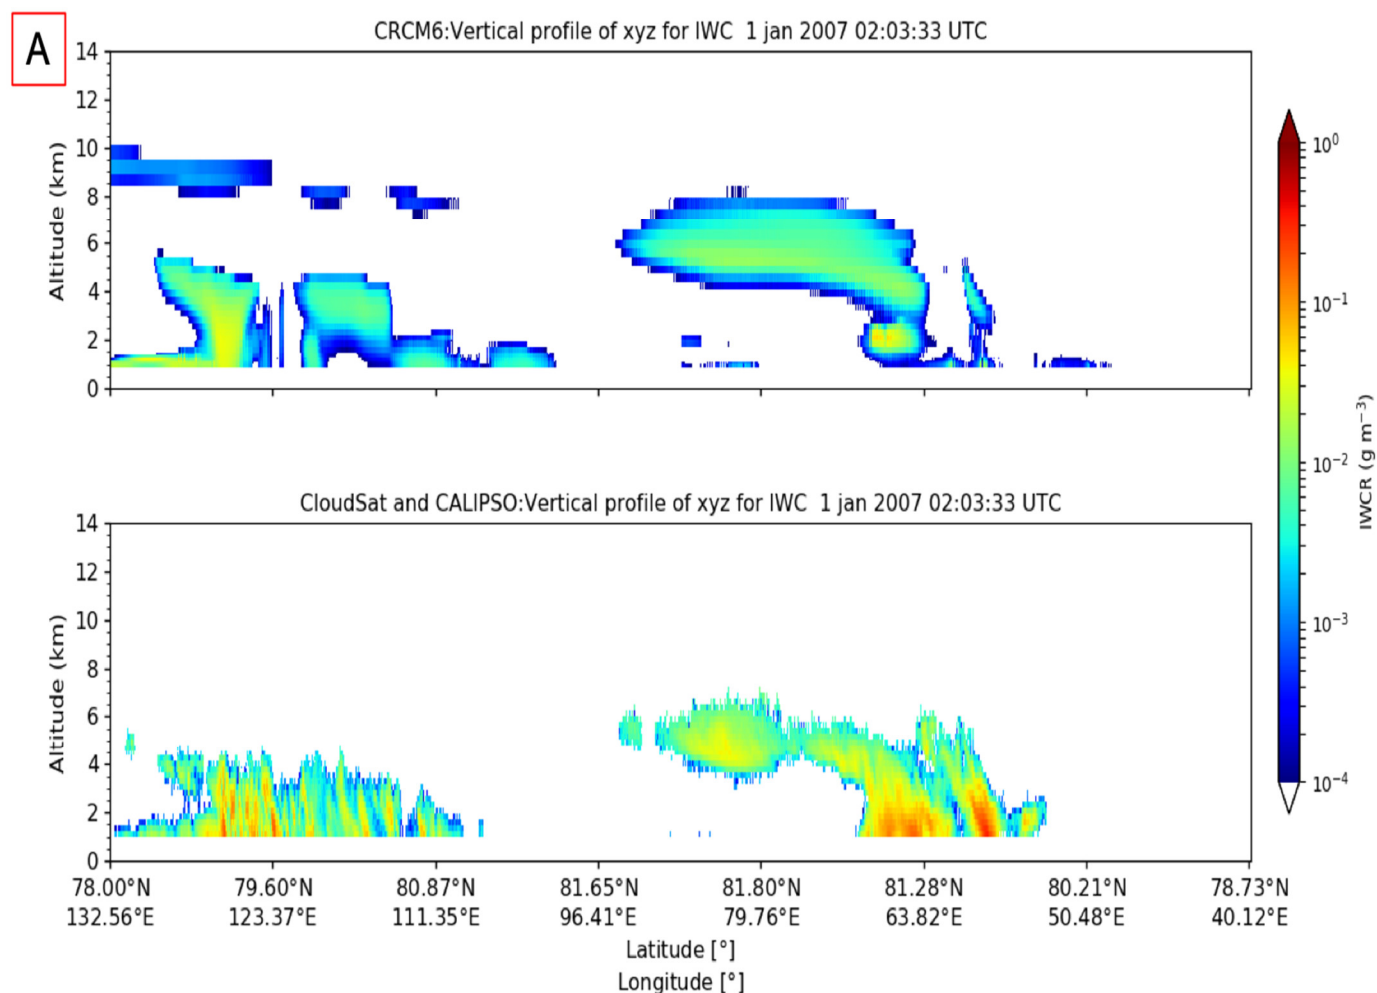

**Figure S1.** Run animation mode to see 2C-ICE IWC profiles blinking with 2B-FLXHR-LIDAR heating rate profiles

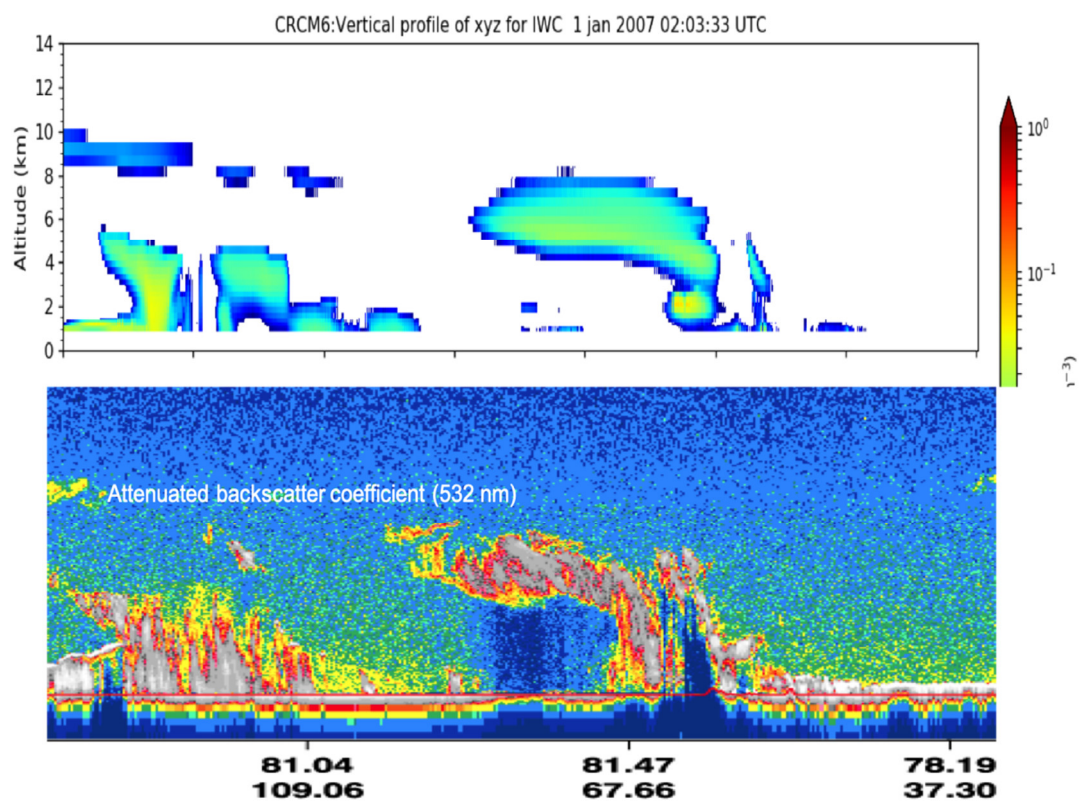

**Figure S2.** Run animation mode to see CALIOP profiles blinking with the 2C-ICE IWC profiles.

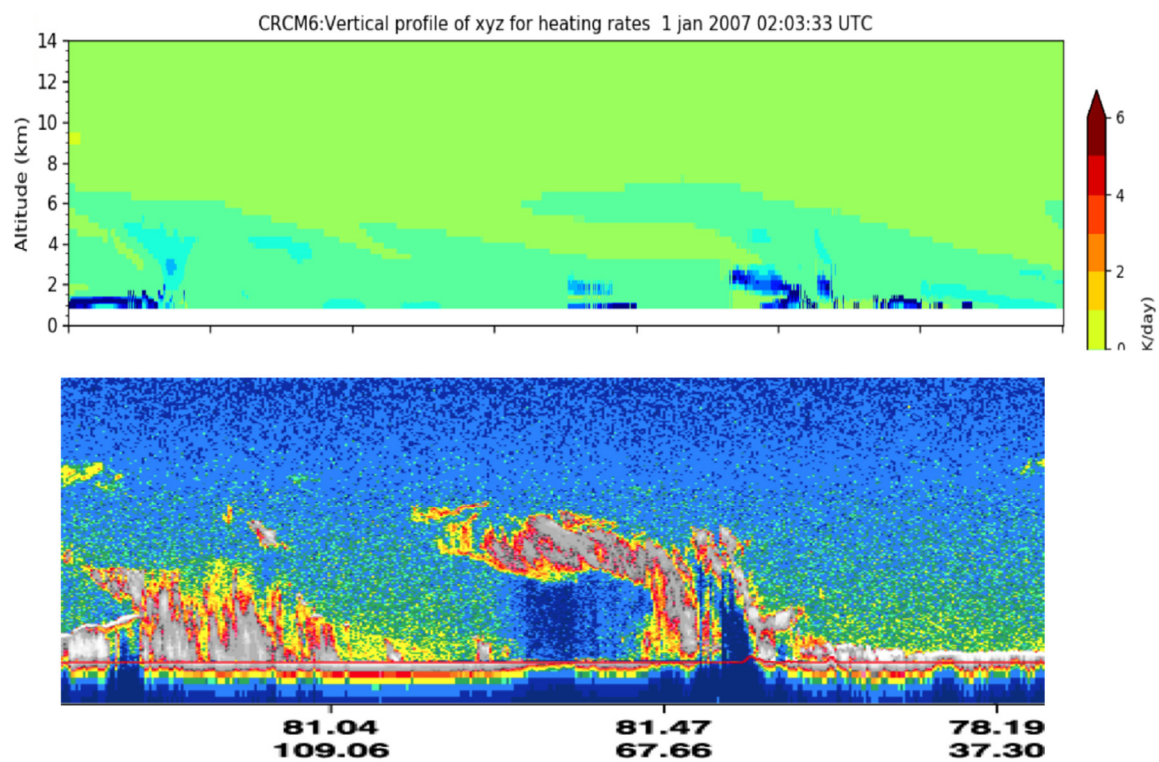

**Figure S3.** Run animation mode to see CALIOP profiles blinking with 2B-FLXHR-LIDAR heating rate profiles.

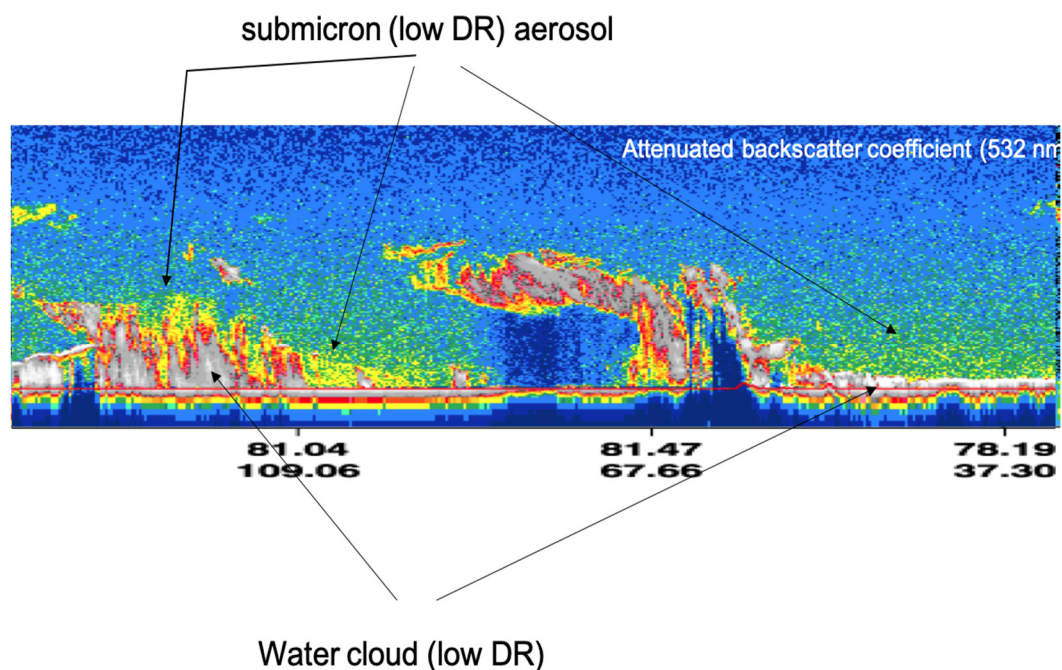

Figure S4. Run animation mode to see CALIOP profiles blinking with CALIOP DR profiles.

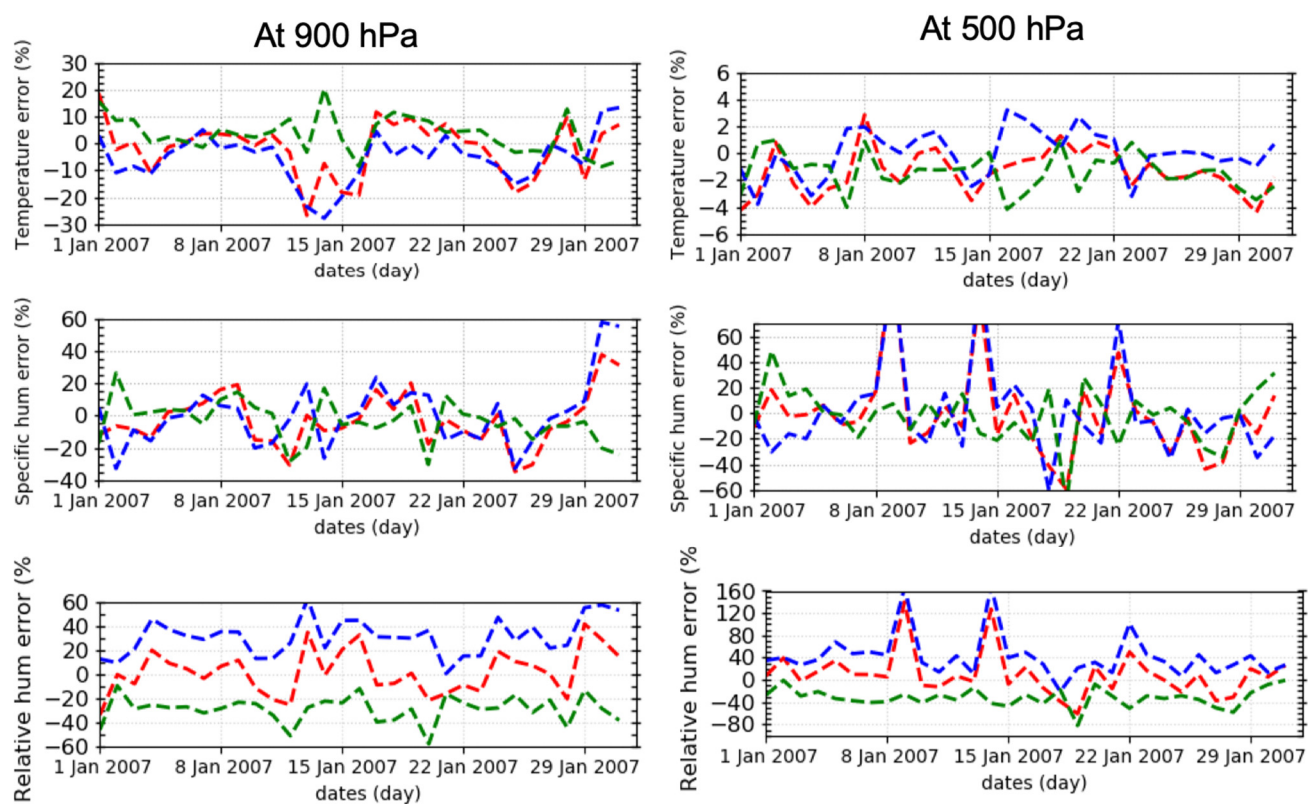

Figure S5. Systematic time deviation in percentage for temperature, SH and RH.
